# Supplementary material for: Patient-reported outcome measures in an outpatient parenteral antimicrobial therapy program: a prospective cohort study
Source: PubMed Central journal article supplement — BMJ Open. 2024 Dec 3;14(12):e084727. doi: 10.1136/bmjopen-2024-084727 (PMC11624759; doi:10.1136/bmjopen-2024-084727), 2024-12-03
Supplement: bmjopen-14-12-s001.pdf [file bmjopen-14-12-s001.pdf]

**SUPPLEMENTARY MATERIAL**

**Table S1.** questionnaire (case report form; CRF) in English.

| Num-ber                                                                                                                                                                            | During the last 7 days, have you had any of the following problems with your work or other regular activities as a result of your therapy program? (role-physical) |                                                                                                                                                                                       |                             |
|------------------------------------------------------------------------------------------------------------------------------------------------------------------------------------|--------------------------------------------------------------------------------------------------------------------------------------------------------------------|---------------------------------------------------------------------------------------------------------------------------------------------------------------------------------------|-----------------------------|
| *                                                                                                                                                                                  | What is your profession? What is your normal workload? (x FTE?)                                                                                                    | <input type="checkbox"/> retired<br><input type="checkbox"/> profession if not retired yet: _____<br><input type="checkbox"/> _____ FTE                                               |                             |
| **                                                                                                                                                                                 | What are your regular activities?                                                                                                                                  | <input type="checkbox"/> _____<br><input type="checkbox"/> _____<br><input type="checkbox"/> _____<br><input type="checkbox"/> _____                                                  |                             |
| 13                                                                                                                                                                                 | Cut down on the amount of time you spent on work or other activities                                                                                               | <input type="checkbox"/> yes                                                                                                                                                          | <input type="checkbox"/> no |
| 13a                                                                                                                                                                                | If yes: How much reduction?                                                                                                                                        | <input type="checkbox"/> > 20%<br><input type="checkbox"/> > 50%<br><input type="checkbox"/> > 80%                                                                                    |                             |
| 14                                                                                                                                                                                 | Accomplished less than you would like                                                                                                                              | <input type="checkbox"/> yes                                                                                                                                                          | <input type="checkbox"/> no |
| 14b                                                                                                                                                                                | If yes: How much reduction?                                                                                                                                        | <input type="checkbox"/> > 20%<br><input type="checkbox"/> > 50%<br><input type="checkbox"/> > 80%                                                                                    |                             |
| 15                                                                                                                                                                                 | Were limited in the kind of work or other activities                                                                                                               | <input type="checkbox"/> yes                                                                                                                                                          | <input type="checkbox"/> no |
| 16                                                                                                                                                                                 | Had difficulty performing the work or other activities (for example, it took extra effort)                                                                         | <input type="checkbox"/> yes                                                                                                                                                          | <input type="checkbox"/> no |
| 16d                                                                                                                                                                                | Why?                                                                                                                                                               | <input type="checkbox"/> tiredness<br><input type="checkbox"/> pain<br><input type="checkbox"/> insecurity with handling of infusion device?<br><input type="checkbox"/> other: _____ |                             |
| <b>During the last 7 days, have you had any of the following problems with your work or other regular daily activities as a result of any emotional problems? (role-emotional)</b> |                                                                                                                                                                    |                                                                                                                                                                                       |                             |
|                                                                                                                                                                                    |                                                                                                                                                                    | Yes                                                                                                                                                                                   | no                          |
| 17                                                                                                                                                                                 | Cut down on the amount of time you spent on work or other activities                                                                                               | <input type="checkbox"/>                                                                                                                                                              | <input type="checkbox"/>    |
| 18                                                                                                                                                                                 | Accomplished less than you would like                                                                                                                              | <input type="checkbox"/>                                                                                                                                                              | <input type="checkbox"/>    |
| 19                                                                                                                                                                                 | Didn't work or other activities as carefully as usual                                                                                                              | <input type="checkbox"/>                                                                                                                                                              | <input type="checkbox"/>    |

|                                                                                                                                                                                                                           |                                                                                                                                                                                                                                  |                          |                          |                                    |                          |                          |                          |
|---------------------------------------------------------------------------------------------------------------------------------------------------------------------------------------------------------------------------|----------------------------------------------------------------------------------------------------------------------------------------------------------------------------------------------------------------------------------|--------------------------|--------------------------|------------------------------------|--------------------------|--------------------------|--------------------------|
| <b>20</b>                                                                                                                                                                                                                 | <b>During the last 7 days, to what extent has your physical health or emotional problems interfered with your normal social activities with family, friends, neighbours or groups? (social functioning)</b>                      |                          |                          |                                    |                          |                          |                          |
|                                                                                                                                                                                                                           | <input type="checkbox"/> not at all<br><input type="checkbox"/> slightly<br><input type="checkbox"/> moderately<br><input type="checkbox"/> quite a bit<br><input type="checkbox"/> extremely                                    |                          |                          |                                    |                          |                          |                          |
| <b>These questions are about how you feel and how things have been with you during the last 7 days. Please give the one answer that is closest to the way you have been feeling for each item. (emotional well-being)</b> |                                                                                                                                                                                                                                  |                          |                          |                                    |                          |                          |                          |
|                                                                                                                                                                                                                           |                                                                                                                                                                                                                                  | All of<br>the<br>time    | Most<br>of the<br>time   | A<br>good<br>bit of<br>the<br>time | Some<br>of the<br>time   | A little of<br>the time  | None of<br>the time      |
| 24                                                                                                                                                                                                                        | Have you been a very nervous person?                                                                                                                                                                                             | <input type="checkbox"/> | <input type="checkbox"/> | <input type="checkbox"/>           | <input type="checkbox"/> | <input type="checkbox"/> | <input type="checkbox"/> |
| 25                                                                                                                                                                                                                        | Have you felt so down in the dumps that nothing could cheer you up?                                                                                                                                                              | <input type="checkbox"/> | <input type="checkbox"/> | <input type="checkbox"/>           | <input type="checkbox"/> | <input type="checkbox"/> | <input type="checkbox"/> |
| 26                                                                                                                                                                                                                        | Have you felt calm and peaceful?                                                                                                                                                                                                 | <input type="checkbox"/> | <input type="checkbox"/> | <input type="checkbox"/>           | <input type="checkbox"/> | <input type="checkbox"/> | <input type="checkbox"/> |
| 28                                                                                                                                                                                                                        | Have you felt downhearted and blue?                                                                                                                                                                                              | <input type="checkbox"/> | <input type="checkbox"/> | <input type="checkbox"/>           | <input type="checkbox"/> | <input type="checkbox"/> | <input type="checkbox"/> |
| 30                                                                                                                                                                                                                        | Have you been a happy person?                                                                                                                                                                                                    | <input type="checkbox"/> | <input type="checkbox"/> | <input type="checkbox"/>           | <input type="checkbox"/> | <input type="checkbox"/> | <input type="checkbox"/> |
| <b>32</b>                                                                                                                                                                                                                 | <b>During the last 7 days, how much of the time has your physical health or emotional problems interfered with your social activities (like visiting with friends, relatives, etc.) (social functioning)</b>                     |                          |                          |                                    |                          |                          |                          |
|                                                                                                                                                                                                                           | <input type="checkbox"/> all of the time<br><input type="checkbox"/> most of the time<br><input type="checkbox"/> some of the time<br><input type="checkbox"/> a little of the time<br><input type="checkbox"/> none of the time |                          |                          |                                    |                          |                          |                          |

| TRUE or FALSE (organizational information) |                                                                                                                                |                                                                                                                                                                                                                |                             |
|--------------------------------------------|--------------------------------------------------------------------------------------------------------------------------------|----------------------------------------------------------------------------------------------------------------------------------------------------------------------------------------------------------------|-----------------------------|
| 37                                         | When you had important questions to ask a nurse, did you get answers that you could understand?                                | <input type="checkbox"/> Yes                                                                                                                                                                                   | <input type="checkbox"/> No |
| Z38                                        | If you had any anxieties or fears about your condition or treatment.<br>Did somebody from the OPAT team discuss them with you? | <input type="checkbox"/> Yes                                                                                                                                                                                   | <input type="checkbox"/> No |
| 39                                         | Did you want to be more involved in decisions made about your care and treatment?                                              | <input type="checkbox"/> Yes                                                                                                                                                                                   | <input type="checkbox"/> No |
|                                            | If yes, please tell us                                                                                                         | <input type="checkbox"/> _____                                                                                                                                                                                 |                             |
| 40                                         | Did a member of the OPAT Team tell the purpose of the medicines you were to take at home in a way you could understand?        | <input type="checkbox"/> Yes                                                                                                                                                                                   | <input type="checkbox"/> No |
| 41                                         | Did a member of the OPAT Team tell you about medication side effects to watch for when you went home?                          | <input type="checkbox"/> Yes                                                                                                                                                                                   | <input type="checkbox"/> No |
| 42                                         | Did someone tell you about danger signals regarding your illness or treatment to watch after you went home?                    | <input type="checkbox"/> Yes                                                                                                                                                                                   | <input type="checkbox"/> No |
| 43                                         | Did you feel secure during therapy?                                                                                            | <input type="checkbox"/> Yes                                                                                                                                                                                   | <input type="checkbox"/> No |
|                                            | If no: why?                                                                                                                    | <input type="checkbox"/> don't know where to ask my questions<br><input type="checkbox"/> feeling uncomfortable<br><input type="checkbox"/> overstrained with the tasks<br><input type="checkbox"/> _____      |                             |
| 44                                         | Did you need support during the last 7 days?                                                                                   | <input type="checkbox"/> Yes                                                                                                                                                                                   | <input type="checkbox"/> No |
|                                            | If yes: who did support you?                                                                                                   | <input type="checkbox"/> partner in household<br><input type="checkbox"/> family<br><input type="checkbox"/> homecare<br><input type="checkbox"/> day clinic at the hospital<br><input type="checkbox"/> _____ |                             |
|                                            | If yes: how did this person help you with?                                                                                     | <input type="checkbox"/> personal hygiene<br><input type="checkbox"/> household<br><input type="checkbox"/> therapy itself<br><input type="checkbox"/> _____                                                   |                             |
| Final questions                            |                                                                                                                                |                                                                                                                                                                                                                |                             |
| 45                                         | Do you recommend the therapy for other patients?                                                                               | <input type="checkbox"/> Yes                                                                                                                                                                                   | <input type="checkbox"/> No |
| 46                                         | If you could change something on your therapy, what would change and why?                                                      | <input type="checkbox"/> _____                                                                                                                                                                                 |                             |

**Table S2.** ZOPATlife Patient characteristics of patients with one compared to those with two interviews

| Characteristics                                                | Patients with two interviews<br>n=33 |         | Patients with one interview<br>n=19* |         | p-value |
|----------------------------------------------------------------|--------------------------------------|---------|--------------------------------------|---------|---------|
| <b>Gender</b>                                                  |                                      |         |                                      |         |         |
| <b>Female sex</b> , n (%)                                      | 7                                    | (21)    | 4                                    | (21)    | 1.000   |
| <b>Male sex</b> , n (%)                                        | 26                                   | (79)    | 15                                   | (79)    |         |
| <b>Age</b> , median years (IQR)                                | 56                                   | (43-71) | 61                                   | (37-74) | 0.476   |
| <b>BMI</b> , median kg/m <sup>2</sup> (IQR)                    | 23                                   | (22-25) | 24                                   | (22-26) | 0.251   |
| <b>Charlson comorbidity index</b> , median (IQR)               | 3                                    | (1-4)   | 3                                    | (1-7)   | 0.455   |
| <b>OPAT setting</b>                                            |                                      |         |                                      |         |         |
| Homecare-OPAT, n (%)                                           | 12                                   | (36)    | 11                                   | (58)    | 0.312   |
| Hospital-OPAT, n (%)                                           | 14                                   | (42)    | 5                                    | (26)    |         |
| Self-administered, n (%)                                       | 7                                    | (21)    | 3                                    | (16)    |         |
| <b>Administration device</b>                                   |                                      |         |                                      |         |         |
| Battery-operated pump, n (%)                                   | 1                                    | (3)     | 0                                    | (0)     | 0.615   |
| Elastomeric pump, n (%)                                        | 18                                   | (55)    | 8                                    | (42)    |         |
| none, n (%)                                                    | 14                                   | (42)    | 11                                   | (58)    |         |
| <b>Indication for OPAT</b> (stratified by ICD-10 codes)        |                                      |         |                                      |         |         |
| Foreign body associated infections <sup>1</sup> , n (%)        | 8                                    | (24)    | 1                                    | (5)     |         |
| Other and unspecified infections and parasitic diseases, n (%) | 5                                    | (15)    | 2                                    | (11)    |         |
| Urinary tract infections, n (%)                                | 4                                    | (12)    | 8                                    | (42)    |         |
| Hepatobiliary infections, n (%)                                | 4                                    | (12)    | 3                                    | (16)    |         |
| Infective endocarditis, n (%)                                  | 4                                    | (12)    | 0                                    | (0)     |         |
| Osteoarticular infections, n (%)                               | 3                                    | (9)     | 2                                    | (11)    |         |
| Central nervous system infections, n (%)                       | 3                                    | (9)     | 1                                    | (5)     |         |
| Respiratory tract infections, n (%)                            | 1                                    | (3)     | 2                                    | (11)    |         |
| Ear, nose and throat infections, n (%)                         | 1                                    | (3)     | 0                                    | (0)     |         |
| Intraabdominal infections n (%)                                | 0                                    | (0)     | 0                                    | (0)     |         |
| <b>OPAT duration</b> , median days (IQR)                       | 15                                   | (6-27)  | 14                                   | (8-25)  | 0.575   |
| <b>Adverse events, line-related</b> , n (%)                    | 2                                    | (6)     | 0                                    | (0)     | 0.527   |
| <b>Adverse events, drug-related</b> , n (%)                    | 3                                    | (9)     | 6                                    | (32)    | 0.059   |

**Abbreviations:** body mass index, BMI; Interquartile range, IQR; Outpatient parenteral antimicrobial therapy, OPAT; acronym of cohort, ZOPATlife. <sup>1</sup> includes prosthetic joint infections, vascular graft infections, breast implant infections

\*n<sub>total</sub>= 20; One patient excluded since therapy was not finished yet.

**Table S3. Outcomes of interviews as mean scores (95% CI) for each domain among the first interview of patients who completed both versus one the first interview**

| <b>Domain</b>               | <b>Patient with two interviews<br/>(n=33)<br/>Mean (95% CI)</b> | <b>Patient with one interview<br/>(n=19*)<br/>Mean (95% CI)</b> | <b>P value</b> |
|-----------------------------|-----------------------------------------------------------------|-----------------------------------------------------------------|----------------|
| <b>Emotional well-being</b> | 66.5 (60.6-72.3)                                                | 66.8 (38.6-74.9)                                                | 0.99           |
| <b>Role emotional</b>       | 47.5 (31.3-63.7)                                                | 18.3 (4.5-32.2)                                                 | 0.02           |
| <b>Role physical</b>        | 19.2 (10.6-27.8)                                                | 7.5 (0.8-14.2)                                                  | 0.06           |
| <b>Social functioning</b>   | 56.8 (46.1-67.5)                                                | 49.4 (35.8-63.0)                                                | 0.34           |

Abbreviations: confidence interval; CI

\* $n_{total} = 20$ ; One patient excluded since therapy was not finished yet.
